# Supplementary material for: Polyhexamethyleneguanidine Phosphate-Induced Cytotoxicity in Liver Cells Is Alleviated by Tauroursodeoxycholic Acid (TUDCA) via a Reduction in Endoplasmic Reticulum Stress
Source: MDPI journal article supplement (doi:10.3390/cells8091023), 2019-09-03
Supplement: s1 [file s1]

# Supplementary figure

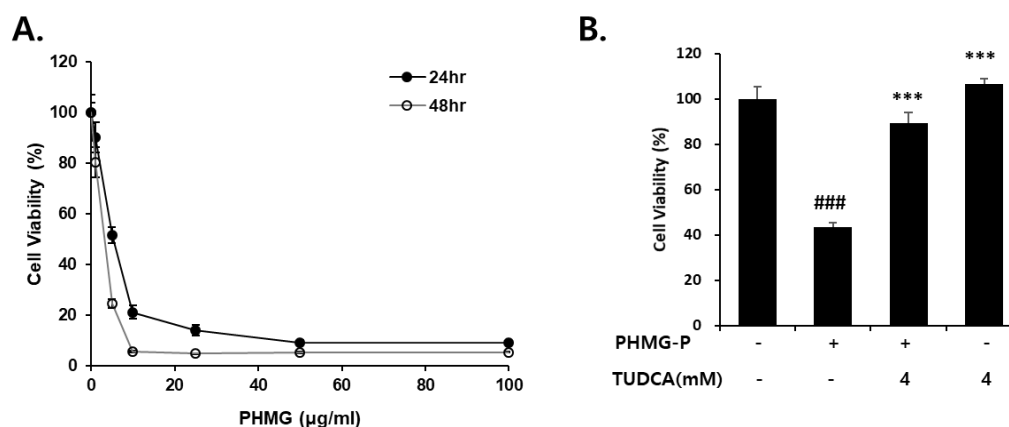

**Figure S1.** Effect of PHMG-P on cell viability and preventive effect of TUDCA on PHMG-P-induced cytotoxicity in AML12 cells. **(A)** Cells were treated with increasing concentrations of PHMG-P for 48 h, and then MTT assays were performed to measure cell viability. Cell viability (%) is expressed as a percentage of the viability of vehicle-treated cells, and data are presented from three independent experiments. Each value represents the mean  $\pm$  SD. **(B)** Cells were pretreated with TUDCA for 2 h and then treated with 5  $\mu$ g/mL PHMG-P for 24 h. MTT assay was performed to measure cell viability. Cell viability (%) was expressed as a percentage of the viability of untreated cells. Each value represents the mean  $\pm$  SD of triplicate experiments. (###  $p < 0.001$ , significant versus vehicle-treated; \*\*\*  $p < 0.001$ , significant versus PHMG alone)
